# Supplementary material
Source: PubMed Central journal article supplement (PMC11027713)
Supplement: 262_2020_2527_MOESM3_ESM.pdf [file 262_2020_2527_MOESM3_ESM.pdf]

Supplemental Table 1. RealTime qPCR primers

| Mouse primers | sequence                                                                         |
|---------------|----------------------------------------------------------------------------------|
| TGFBR1        | mTβR1-FWD 5'-CGCTCTGTCCACGGCAAG-3'<br>mTβR1-RV 5'-TCATGTCTCACAGCAAGTCCC-3'       |
| TGFBR2        | mTβR2-FWD 5'-GGCCAAGCTGAAGCAGAA-3'<br>mTβR2-RV 5'-GGATGTTCTCGTGTTTCAGGTT-3'      |
| TGFB1         | mTGFβ1-FWD 5'-CTCCCGTGGCTTCTAGTG-3'<br>mTGFβ1 RV 5'-GCCTTAGTTTGGACAGGATCTG-3'    |
| Human primers | sequence                                                                         |
| TGFBR2        | huTβR2 FWD 5'-ACTTTATTCTGGAAGCTGCT-3'<br>huTβR2 RV 5'-GCTGATGCCTGTCACTTGAA-3'    |
| TGFBR1        | huTGFβ1 FWD 5'-CCCAGCATCTGCAAAGCTC-3'<br>huTGFβ1 RV 5'-GTCAATGTACAGCTGCCGCA-3'   |
| TGFB1         | huTβR1 FWD 5'-CGAGTGCCAAATGAAGAGGA-3'<br>huTβR1 RV 5'-CGACCTTTGCCAATGCTTTC-3'    |
| STAT5A        | huSTAT5A FWD 5'-TACTGAAGATCAAGCTGGGG-3'<br>huSTAT5A RV 5'-ATTGTACAGAATGTGCCGG-3' |
| STAT5B        | huSTAT5B FWD 5'-CATTTTCCCATTGAGGTGC-3'<br>huSTAT5B RV 5'-GGGTGGCCTTAATGTTCTCC-3' |
| IL8           | hu IL8 FWD 5'-CTTGGCAGCCTCCTGATTT-3'<br>hu IL8 REV 5'-TTCTTTAGCACTCCTTGGCAA-3'   |
| 18s           | 18s FWD 5'-GTAACCCGTTGAACCCATT-3'<br>18S RV 5'-CCATCCAATCGGTAGTAGCG-3'           |

Supplemental Figures

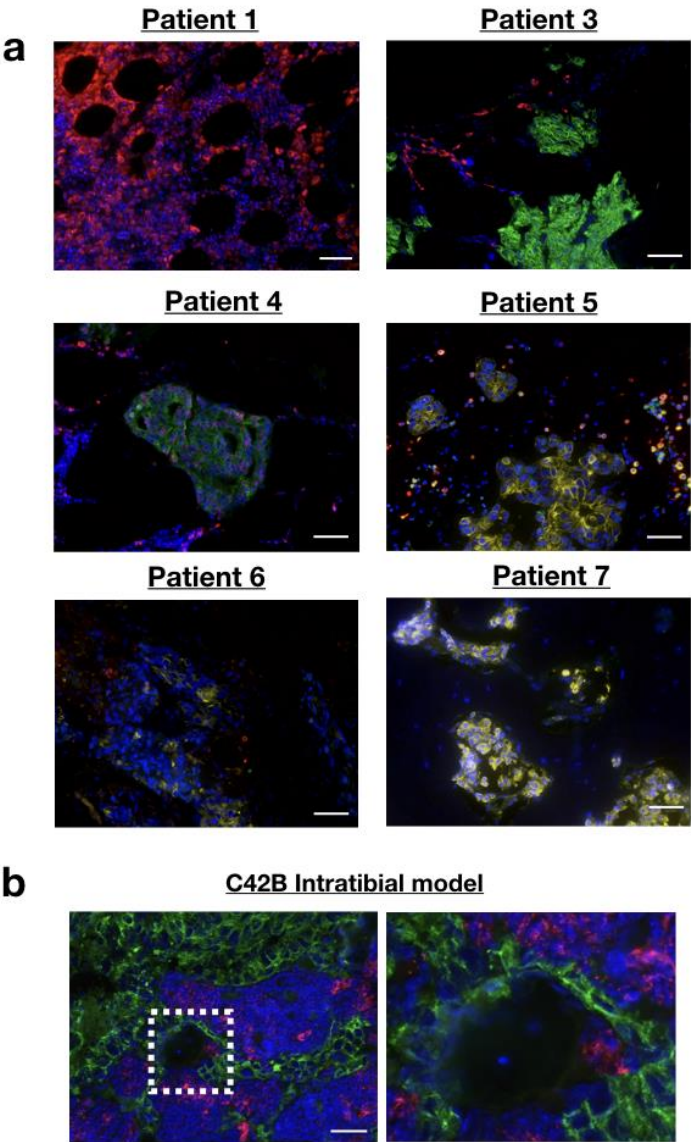

Costanzo-Garvey et al. Supp. Figure 1

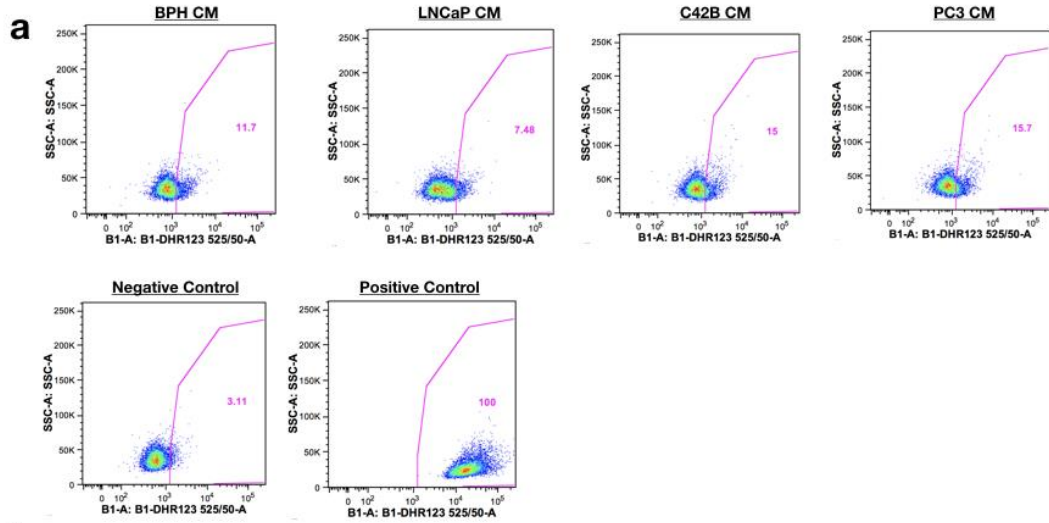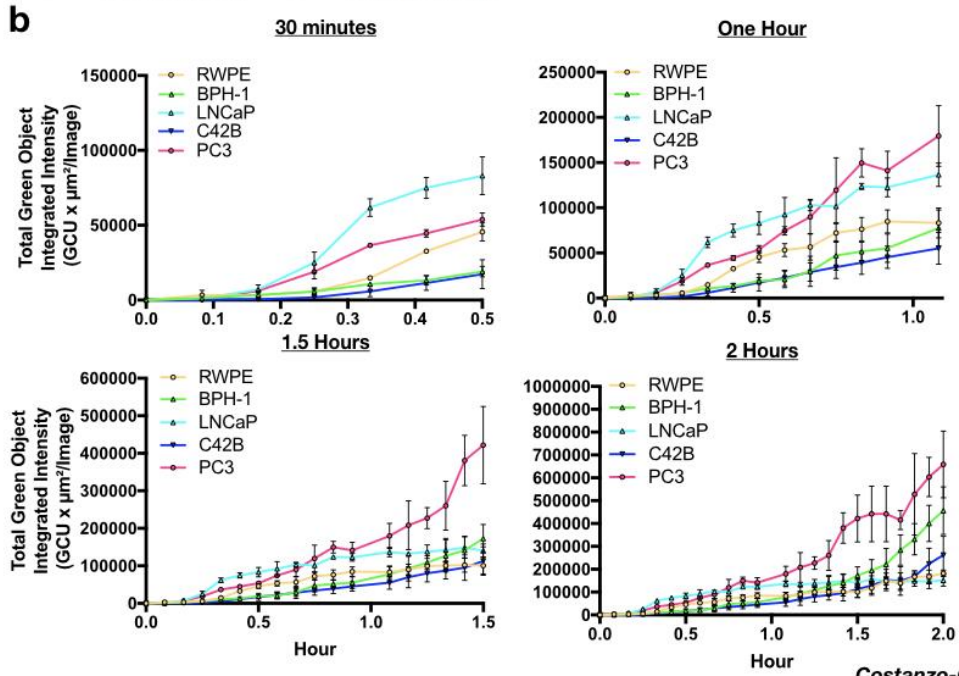

Costanzo-Garvey et al. Supp Figure 2

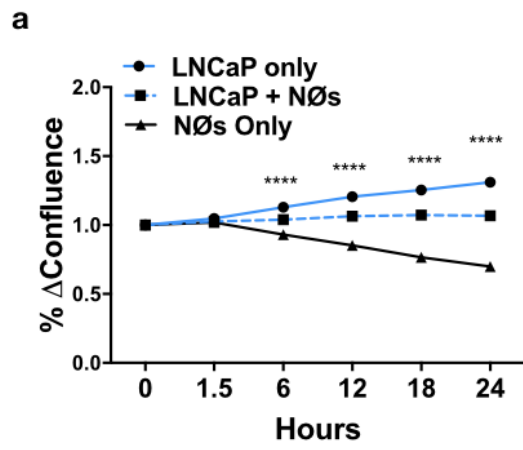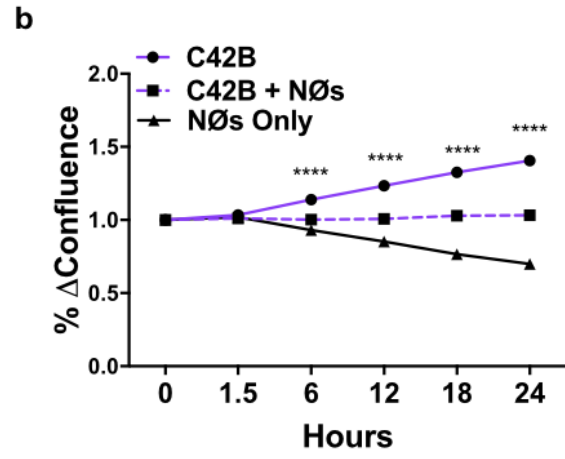

*Costanzo-Garvey et al. Supp. Figure 3*

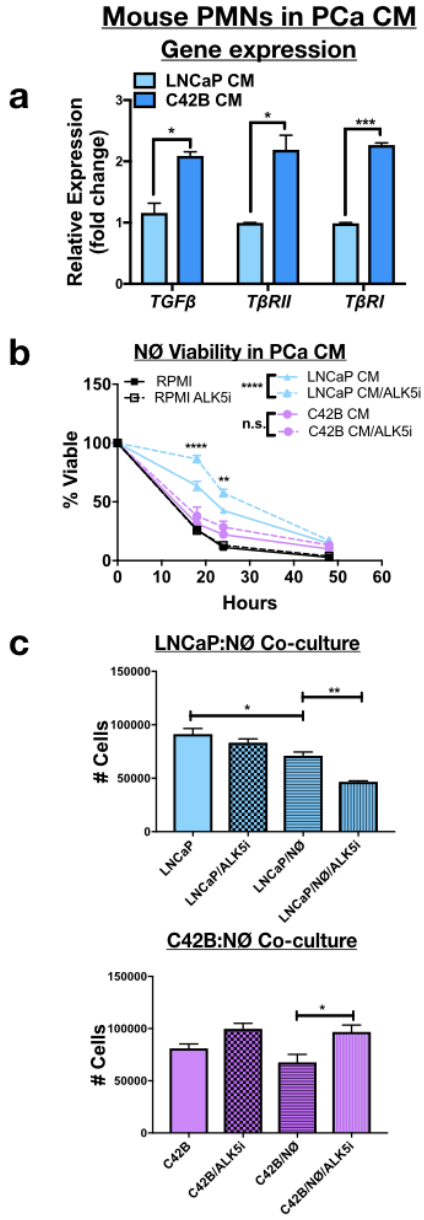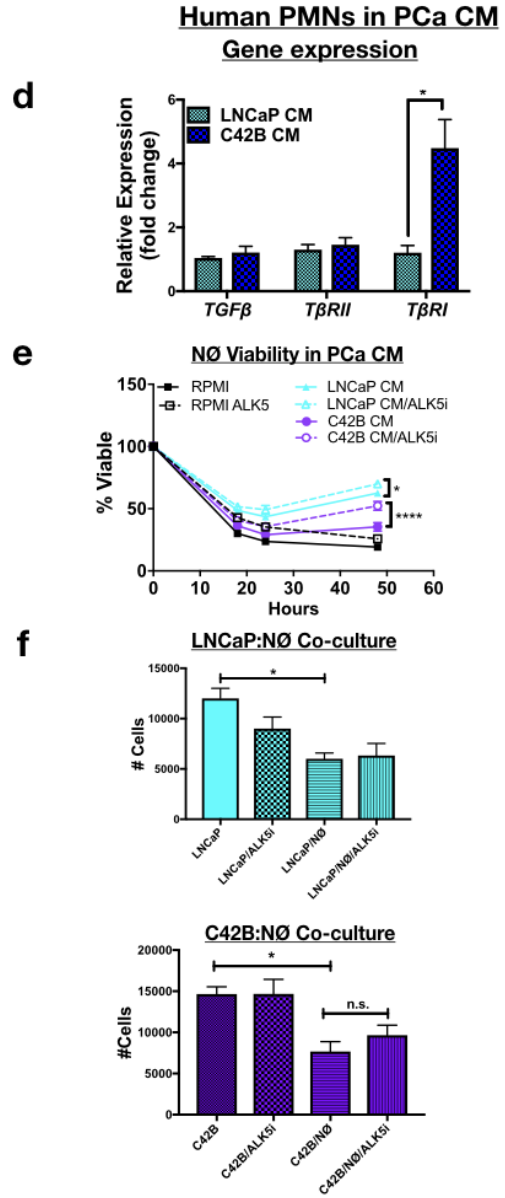

Costanzo-Garvey et al. Supp. Figure 4

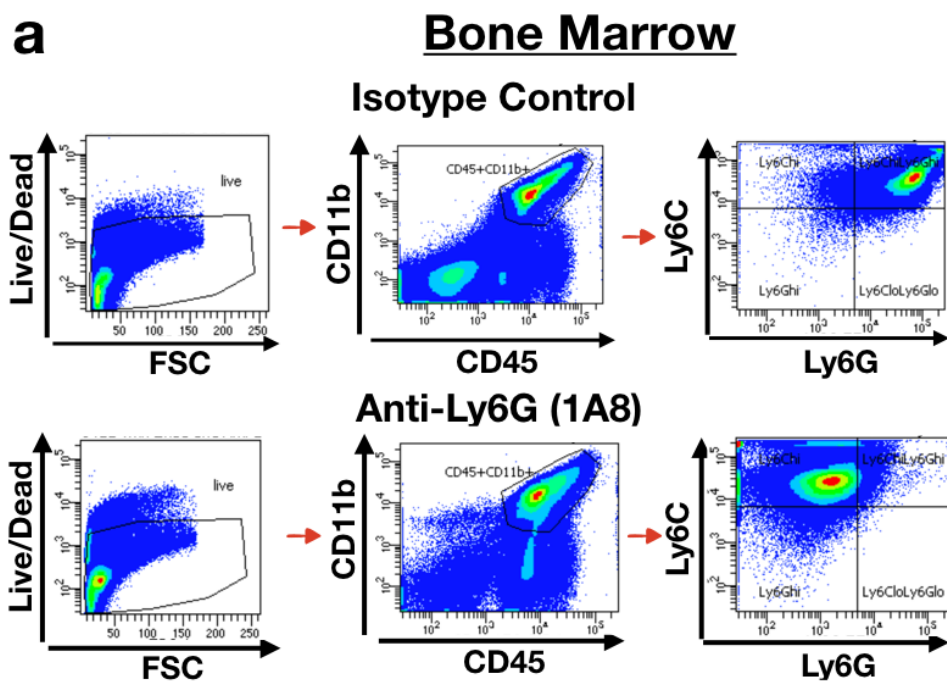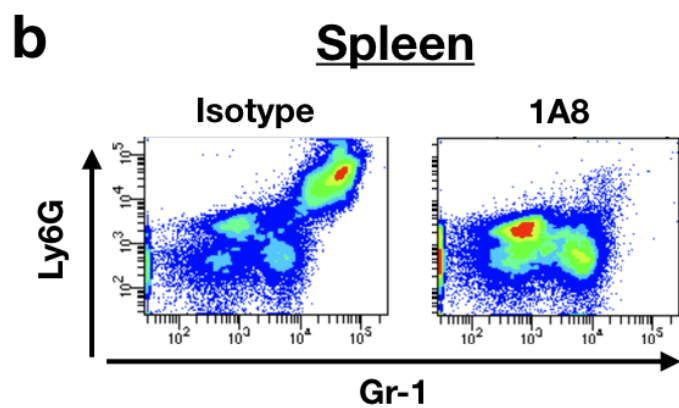

*Costanzo-Garvey et al. Supp. Figure 5*

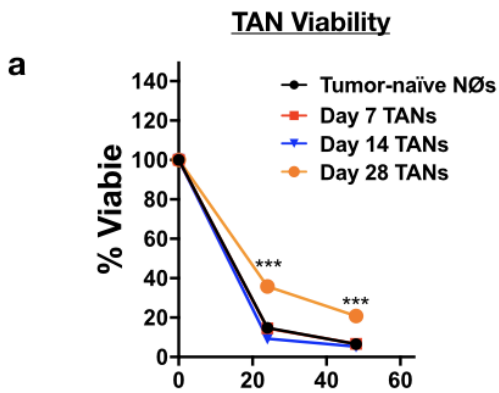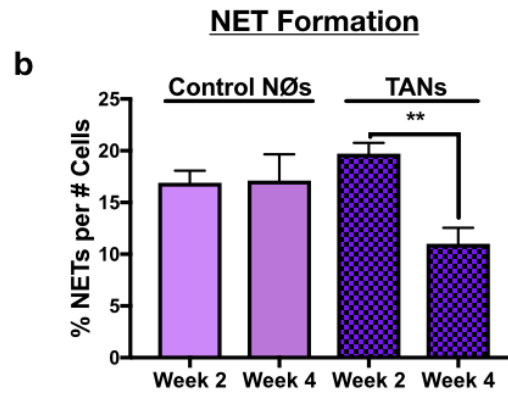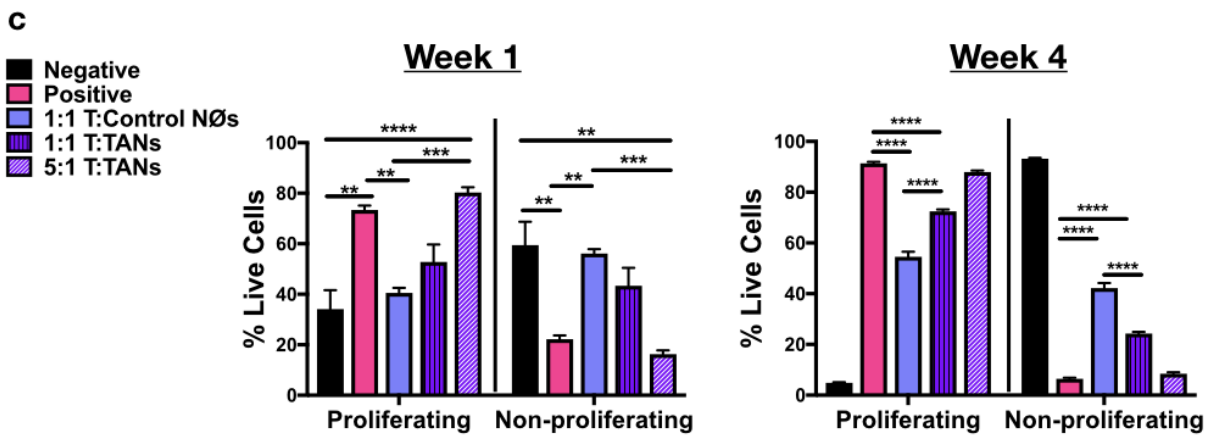

Costanzo-Garvey et al. Supp. Figure 6

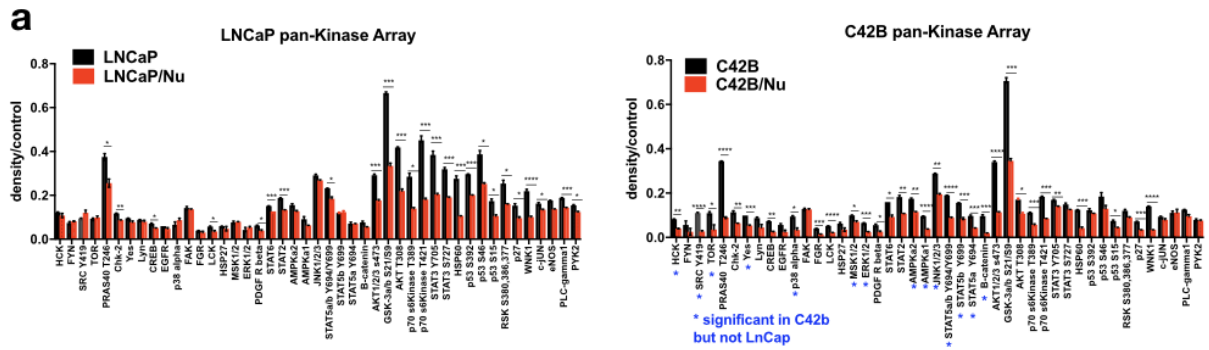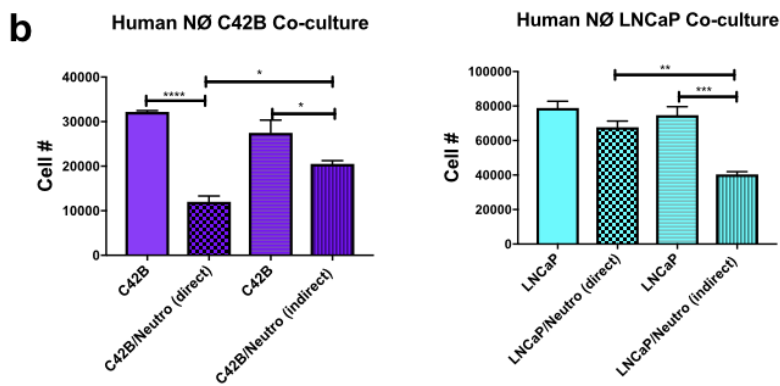

Costanzo-Garvey et al. Supp. Figure 7



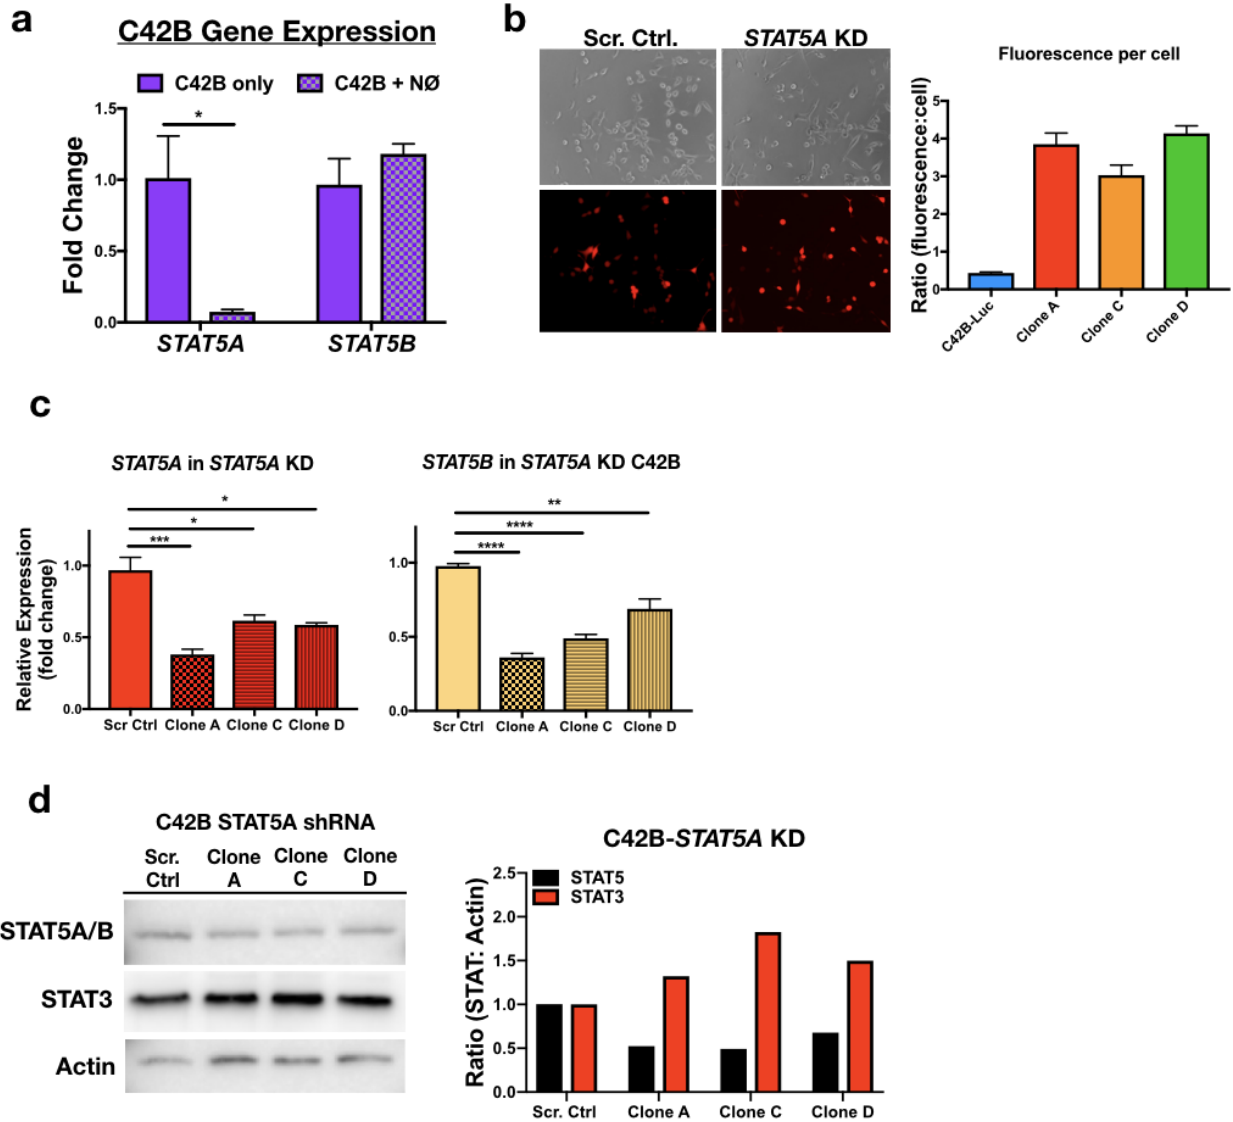

*Costanzo-Garvey et al. Supp Figure 8*
